## Sex-differences in outcomes after PCI or CABG for left main disease: from the DELTA registries

F. Moroni<sup>1</sup>, A. Beneduce<sup>2</sup>, G. Giustino<sup>3</sup>, I. Breite<sup>4</sup>, S.J. Park<sup>5</sup>, J. Daemen<sup>6</sup>, M.C. Morice<sup>7</sup>, S. Nakamura<sup>8</sup>, E. Meliga<sup>9</sup>, E. Cerrato<sup>10</sup>, R. Makkar<sup>11</sup>, M. Valgimigli<sup>12</sup>, R. Mehran<sup>3</sup>, A. Colombo<sup>13</sup>, A. Chieffo<sup>2</sup>

<sup>1</sup>University Vita-Salute San Raffaele, Milan, Italy; <sup>2</sup>San Raffaele Hospital, Milan, Italy; <sup>3</sup>Icahn School of Medicine at Mount Sinai, New York, United States of America; <sup>4</sup>Paul Stradins Clinical University Hospital, Riga, Latvia; <sup>5</sup>Asan Medical Center, Seoul, Korea (Republic of); <sup>6</sup>Erasmus University Medical Centre, Rotterdam, Netherlands (The); <sup>7</sup>Jacques Cartier Private Hospital, Massy, France; <sup>8</sup>New Tokyo Hospital, Chiba, Japan; <sup>9</sup>Mauriziano Hospital, Turin, Italy; <sup>10</sup>San Luigi Gonzaga Hospital, Turin, Italy; <sup>11</sup>Cedars-Sinai Medical Center, Los Angeles, United States of America; <sup>12</sup>Bern University Hospital, Inselspital, Bern, Switzerland; <sup>13</sup>Maria Cecilia Hospital, Cotignola, Italy

On behalf of DELTA and DELTA 2 investigators

**Funding Acknowledgement:** Type of funding source: None

**Background:** Women have worse outcomes than men after PCI, with some studies suggesting a lower mortality of CABG vs PCI in females.

**Purpose:** To assess the outcomes of CABG and PCI according to sex in a large registry population of patients with unprotected left main coronary artery (ULMCA) disease.

**Methods:** The DELTA and DELTA 2 registries are two multicentric, prospective registries evaluating the outcomes of subjects undergoing coronary revascularization for ULMCA disease.

**Results:** Total population was 6253 patients, 27% women. Table 1 shows baseline clinical characteristics. Median follow up was of 880 days. Women undergoing CABG had lower incidence of death, myocardial infarction (MI)

or cerebrovascular accident (CVA) (HR 0.53, 95% CI 0.35–0.79) and a lower risk of death (HR 0.40, 95% CI 0.24–0.67). No significant differences were observed in men (Figure 1A). Significant interaction was observed between sex and revascularization strategy for both outcomes ( $p < 0.01$ –Figure 1B). CABG was associated with lower risk of target-vessel and target-lesion revascularization consistently in women and men (pint=0.49 and pint=0.89, respectively–Figure 1B).

**Conclusions:** In women undergoing coronary revascularization for ULMCA disease, CABG is associated to lower risk of death, MI or CVA. Further dedicated studies are needed to determine the optimal revascularization strategy in women with ULMCA disease.

Baseline characteristics

|                            | Total (6253) | Females (1689) |            | Males (4564) |            | p      |
|----------------------------|--------------|----------------|------------|--------------|------------|--------|
|                            |              | PCI (1365)     | CABG (324) | PCI (4002)   | CABG (562) |        |
| Age (years)                | 68±11        | 70±12          | 68±10      | 67±11        | 65±10      | <0.001 |
| Hypertension               | 4547 (73)    | 1090 (80)      | 236 (73)   | 2858 (71)    | 363 (64)   | <0.001 |
| Dyslipidemia               | 4244 (68)    | 968 (68)       | 228 (70)   | 2703 (68)    | 345 (62)   | 0.003  |
| Never smoker               | 3765 (60)    | 1062 (78)      | 269 (83)   | 2196 (55)    | 238 (42)   | <0.001 |
| Diabetes                   | 1916 (31)    | 474 (35)       | 100 (31)   | 1143 (29)    | 199 (35)   | 0.001  |
| Chronic kidney disease     | 1219 (19)    | 353 (26)       | 9 (3)      | 830 (21)     | 27 (5)     | 0.024  |
| Acute coronary syndromes   | 1106 (18)    | 469 (34)       | 35 (11)    | 1081 (27)    | 66 (12)    | <0.001 |
| Previous revascularization | 2329 (38)    | 478 (35)       | 52 (16)    | 1716 (43)    | 83 (15)    | <0.001 |
| • Previous PCI             | 2040 (32)    | 411 (30)       | 48 (15)    | 1507 (38)    | 74 (13)    | <0.001 |
| • Previous CABG            | 512 (8)      | 100 (7)        | 13 (4)     | 389 (10)     | 10 (2)     | 0.008  |
| LVEF                       | 54±11        | 54±10          | 55±11      | 53±10        | 53±11      | <0.001 |

Values are expressed as n (%) or mean ± SD. p-values refer to female vs male comparison.

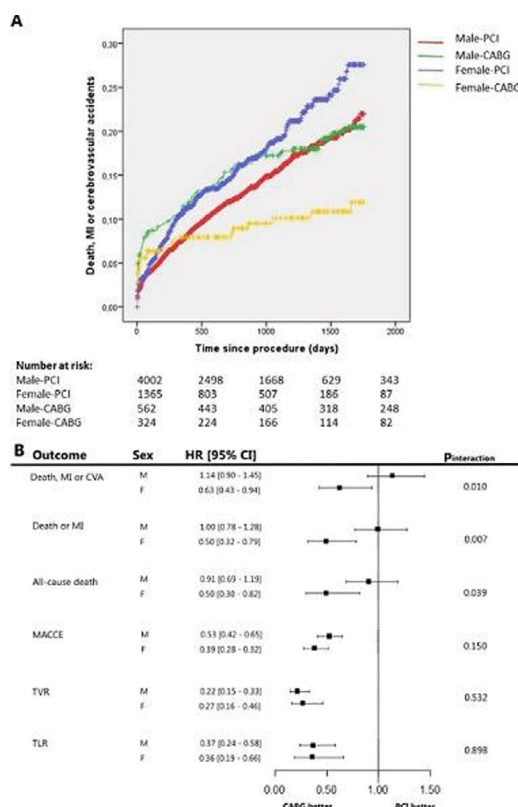

Figure 1
